# Supplementary material for: Cost-Effectiveness of Early Irbesartan Treatment Versus Control (Standard Antihypertensive Medications Excluding ACE Inhibitors, Other Angiotensin-2 Receptor Antagonists, and Dihydropyridine Calcium Channel Blockers) or Late Irbesartan Treatment in Patients With Type 2 Diabetes, Hypertension, and Renal Disease
Source: Oxford University Press journal article supplement (doi:10.2337/diacare.27.8.1897), 2004-08-01
Supplement: 2047-sup-dc0178_online_appendix.doc [file 2047-sup-dc0178_online_appendix.doc]

**Appendix**

**Table.** Transition probabilities used in the model

|  | **Irbesartan**  **300 mg daily** | | **Standard Blood**  **Pressure Control Alone** |
| --- | --- | --- | --- |
| p progression from  ***microalbuminuria*** to ***early overt nephropathy*** | | | |
| year 1 | 0.0250 | | 0.0950 |
| years 2+ | 0.0360 | | 0.0830 |
| p progression from  ***early overt nephropathy*** to ***advanced overt nephropathy*** * | | | |
| year 0 | 0.0678  0.4545  0.3667  0.5263  0.6667  0.6667  0.0000  0.0000  1.0000 | | |
| year 1 |
| year 2 |
| year 3 |
| year 4 |
| year 5 |
| year 6 |
| year 7 |
| years 8+ |
| p progression from  ***advanced overt nephropathy*** to ***DSC*** | | | |
| year 1 | 0.0069 | | 0.0141 |
| year 2 | 0.0454 | | 0.0486 |
| year 3 | 0.0423 | | 0.0644 |
| years 4+ | 0.0315 | | 0.0424 |
| p progression from  ***advanced overt nephropathy*** to ***ESRD*** | | | |
| year 1 | 0.0311 | | 0.0246 |
| year 2 | 0.0207 | | 0.0447 |
| year 3 | 0.0249 | | 0.0396 |
| years 4+ | 0.0256 | | 0.0363 |
| p progression from  ***DSC*** to ***ESRD*** | | | |
| years 1+ | 0.5376 | 0.6042 | |
| p moving from ***dialysis*** to ***transplant*** | years 1+: 0.0400 | | |
| p moving from ***transplant*** to ***dialysis*** | years 1+: 0.1180 | | |
| p death in ***dialysis*** | year 0: 0.2152  years 1-5: 0.2563  years 6-10: 0.3060  years 11-20: 0.3936  years 21-25: 0.5671 | | |
| p death in ***transplant*** | year 0: 0.0737  years 1-5: 0.0932  years 6-10: 0.1140  years 11-20: 0.1664  years 21-25: 0.1876 | | |
| p death in ***microalbuminuria*** | age- and gender-specific probabilities for the general USA population, multiplied by RR of 2.0 | | |
| p death in ***early overt nephropathy***, ***advanced overt nephropathy***, and ***DSC*** | age- and gender-specific mortality probabilities for the general USA population, multiplied by RR of 4.4 | | |

p = annual transition probability; vs. = versus; “year” refers to the years spent in any given state; RR = relative risk. *= Conservatively assumed to be the same for both treatment arms.
